# Supplementary material for: Hsp70 (HSPA1) Lysine Methylation Status as a Potential Prognostic Factor in Metastatic High-Grade Serous Carcinoma
Source: PubMed Central journal article supplement (PMC4598032; doi:10.1371/journal.pone.0140168), 2015-10-08

**A**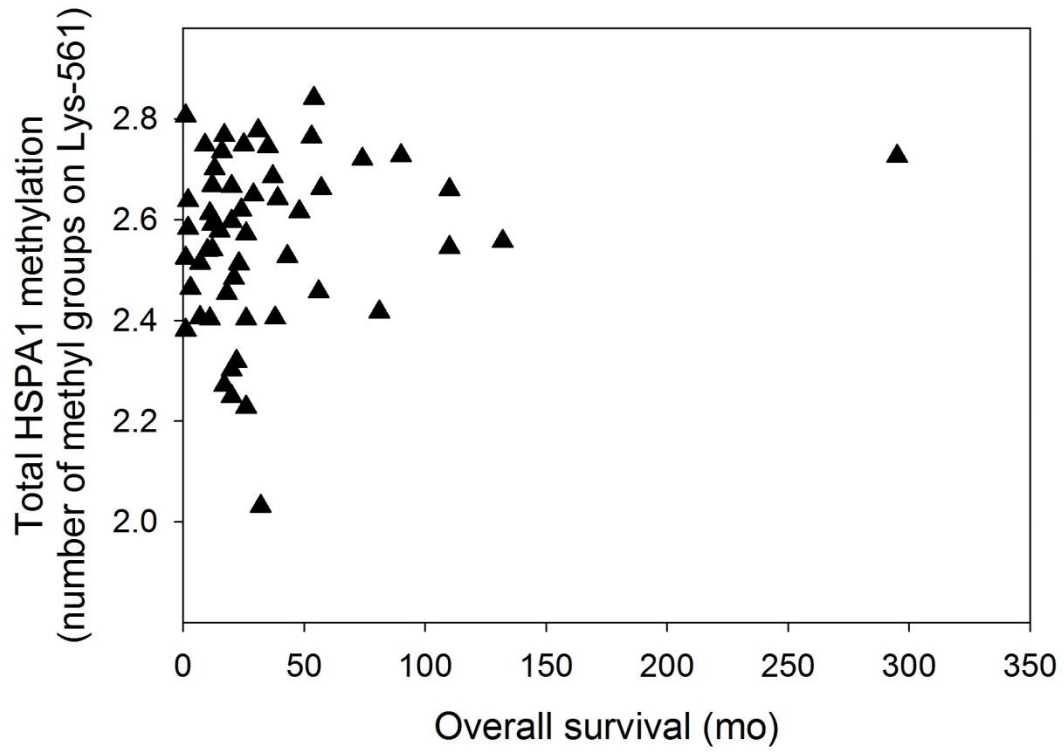**B**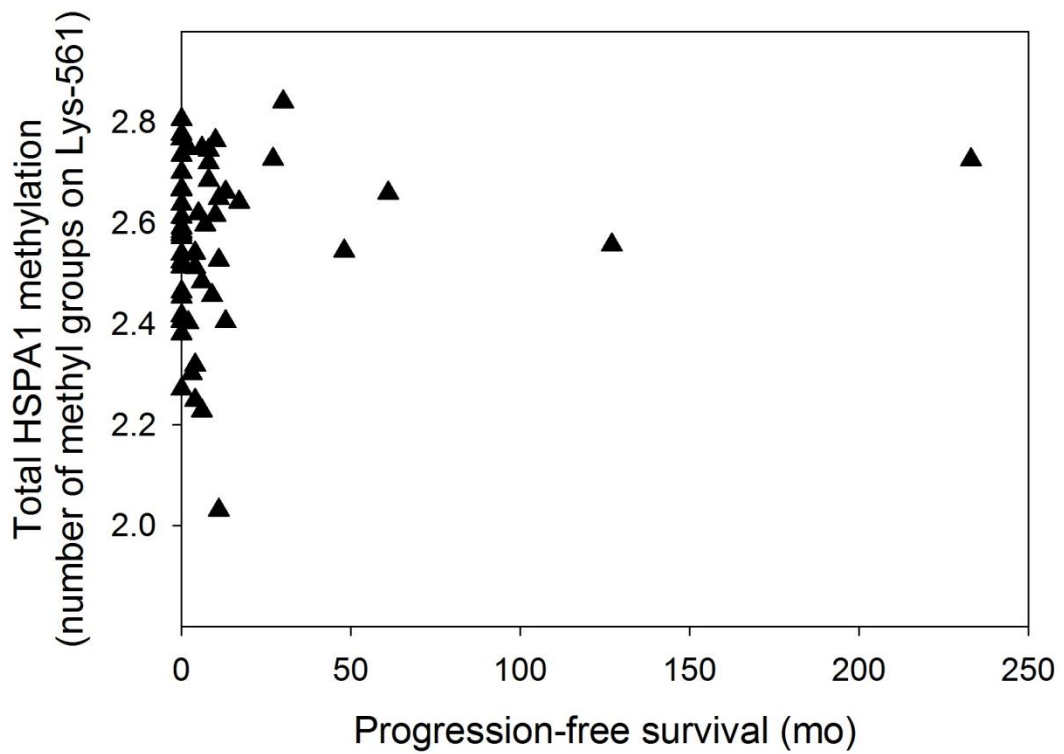

Supplement: pone.0140168.s001.pdf [file pone.0140168.s001.pdf]
